# Supplementary material
Source: PubMed Central journal article supplement (PMC6175607)
Supplement: NIHMS1503132-supplement-11.pdf [file NIHMS1503132-supplement-11.pdf]

**Table S1. Characteristics of disease-associated short tandem repeats (daSTRs) and their associated genes. Related to Figure 1, 2, 3, 4**

| Gene <sup>1,4</sup> | Disease                               | Repeat Sequence | Repeat Location  | Repeats for Disease <sup>2</sup> | Repeats Found in hg19 <sup>3</sup> | Number of Isoforms | RefSeq IDs <sup>4</sup>                                                                                                                                                                                                                                                                                                               |
|---------------------|---------------------------------------|-----------------|------------------|----------------------------------|------------------------------------|--------------------|---------------------------------------------------------------------------------------------------------------------------------------------------------------------------------------------------------------------------------------------------------------------------------------------------------------------------------------|
| FMR1                | Fragile X syndrome                    | CGG             | 5' UTR           | >200                             | 10                                 | 5                  | NM_001185075, NM_001185076, NM_001185081, NM_001185082, NM_002024                                                                                                                                                                                                                                                                     |
| PPP2R2B             | Spinocerebellar ataxia 12             | CAG             | Promoter, 5' UTR | >50                              | 10                                 | 8                  | NM_181677, NM_181676, NM_001271899, NM_181674, NM_181678, NM_001271900, NM_001271948, NM_181675                                                                                                                                                                                                                                       |
| ATXN1               | Spinocerebellar ataxia 1              | CAG             | Exon             | >30                              | 14                                 | 2                  | NM_000332, NM_001128164                                                                                                                                                                                                                                                                                                               |
| ATXN2               | Spinocerebellar ataxia 2              | CAG             | Exon             | >30                              | 13                                 | 1                  | NM_002973                                                                                                                                                                                                                                                                                                                             |
| ATXN3               | Spinocerebellar ataxia 3              | CAG             | Exon             | >30                              | 8                                  | 27                 | NM_001127697, NR_028456, NR_028455, NM_001164778, NM_001164777, NM_001164776, NM_001164774, NM_004993, NR_028468, NR_028467, NR_028470, NR_028469, NR_028464, NR_028465, NR_028458, NR_028460, NR_028462, NM_030660, NR_031765, NR_028463, NM_001164782, NM_001164781, NR_028457, NR_028461, NM_001164779, NM_001164780, NM_001127696 |
| CACNA1A             | Spinocerebellar ataxia 6              | CAG             | Exon             | >30                              | 13                                 | 5                  | NM_000068, NM_023035, NM_001174080, NM_001127222, NM_001127221                                                                                                                                                                                                                                                                        |
| ATXN7               | Spinocerebellar ataxia 7              | CAG             | Exon             | >30                              | 10                                 | 3                  | NM_001177387, NM_000333, NM_001128149                                                                                                                                                                                                                                                                                                 |
| HTT                 | Huntington's disease                  | CAG             | Exon             | >30                              | 19                                 | 1                  | NM_002111                                                                                                                                                                                                                                                                                                                             |
| AR                  | Spinal and bulbar muscular atrophy    | CAG             | Exon             | >30                              | 22                                 | 2                  | NM_000044, NM_001011645                                                                                                                                                                                                                                                                                                               |
| ATN1                | Dentatorubral-pallidoluyasian atrophy | CAG             | Exon             | >50                              | 15                                 | 2                  | NM_001940, NM_001007026                                                                                                                                                                                                                                                                                                               |
| FXN                 | Friedreich's ataxia                   | GAA             | Intron           | >50                              | 6                                  | 3                  | NM_001161706, NM_000144, NM_181425                                                                                                                                                                                                                                                                                                    |

|                    |                                                        |                  |                 |             |      |   |                                                           |
|--------------------|--------------------------------------------------------|------------------|-----------------|-------------|------|---|-----------------------------------------------------------|
| CNBP               | Myotonic dystrophy 2                                   | CCTG             | Intron          | >50         | 8    | 4 | NM_003418, NM_001127196,<br>NM_001127194, NM_001127192    |
| ATXN10             | Spinocerebellar ataxia 10                              | ATTCT            | Intron          | >200        | 14   | 2 | NM_001167621, NM_013236                                   |
| BEAN1              | Spinocerebellar ataxia 31                              | TGGAA            | Intron          | >100        | None | 4 | NM_001136106, NM_001178020,<br>NM_001197224, NM_001197225 |
| NOP56 <sup>5</sup> | Spinocerebellar ataxia 36                              | GGCCTG           | Intron          | >1000       | 4    | 1 | NM_006392                                                 |
| C9ORF72            | Amyotrophic lateral sclerosis                          | GGGGCC           | Intron          | >50         | 3    | 3 | NM_018325, NM_145005,<br>NM_001256054                     |
| COMP*              | Multiple skeletal dysplasias                           | GAC              | Exon            | >10         | 5    | 1 | NM_000095                                                 |
| HOXD13*            | Synpolydactyly syndrome                                | GCG              | Exon            | >20         | 5    | 1 | NM_000523                                                 |
| HOXA13*            | Hand-foot-genital syndrome                             | GCG              | Exon            | >20         | 3    | 1 | NM_000522                                                 |
| RUNX2              | Cleidocranial dysplasia                                | GCG              | Exon            | >25         | 5    | 2 | NM_001024630, NM_001015051                                |
| ZIC2               | Holoprosencephaly                                      | GCG              | Exon            | >20         | 5    | 1 | NM_007129                                                 |
| PABPN1*            | Oculopharyngeal muscular atrophy                       | GCG              | Exon            | >10         | 6    | 1 | NM_004643                                                 |
| FOXL2              | Blepharophimosis, ptosis, epicanthus inversus syndrome | GCG              | Exon            | >20         | 3    | 1 | NM_023067                                                 |
| ARX                | ARX-related X-linked mental retardation                | GCG              | Exon            | >20         | 10   | 1 | NM_139058                                                 |
| DMPK               | Myotonic dystrophy 1                                   | CTG              | 3' UTR          | >75         | 20   | 4 | NM_001081562, NM_001081563,<br>NM_004409, NM_001081560    |
| ATXN8OS            | Spinocerebellar ataxia 8                               | CTG              | 3' UTR          | >100        | 15   | 1 | NR_002717                                                 |
| JPH3               | Huntington's disease-like 2                            | CTG              | 3' UTR,<br>exon | >30         | 14   | 3 | NM_020655, NM_001271605<br>NM_001271604                   |
| CSTB               | Myoclonic epilepsy of Unverricht and Lundborg          | CCCCGC<br>CCCCGC | Promoter        | Unknow<br>n | 3    | 1 | NM_000100                                                 |
| TBP <sup>5</sup>   | Spinocerebellar ataxia 17                              | CAG              | Exon            | >30         | 19   | 2 | NM_003194, NM_001172085                                   |

<sup>1,2</sup> From Iyer et al. Annu Rev Biochem 2015, La Spada et al. Nat Rev Genet 2010.

<sup>3</sup> See Methods, Table S3.

<sup>4</sup> From UCSC Genome Browser, accessed 12/28/2016.

<sup>5</sup> Genome folding not queried due to chromosomal placement, excluded from analysis.

\*Repeat expansion not linked to neurological dysfunction



**Table S3: Properties of four classes of disease-associated STRs (daSTRs). Related to Figure 2, 4**

| <b>Group label</b> | <b>Group description</b>           | <b>daSTR genes</b>                                 | <b>Repeat unit</b> | <b>Location</b> | <b>Number of matched repeats found in hg19</b> | <b>Range of repeat units in matched repeats</b> |
|--------------------|------------------------------------|----------------------------------------------------|--------------------|-----------------|------------------------------------------------|-------------------------------------------------|
| A                  | CAG Exons and 5'UTR                | AR, ATN1, ATXN1, ATXN2, ATXN3, ATXN7, CACNA1A, HTT | CAG                | Exon            | 626                                            | 5 - 19                                          |
|                    |                                    | PPP2R2B                                            | CAG                | 5'UTR           | 160                                            | 5 - 22                                          |
| B                  | GCG Exons and 5'UTR                | ARX, HOXA13, HOXD13, FOXL2, PABPN1, RUNX2, ZIC2    | GCG                | Exon            | 531                                            | 5 - 17                                          |
|                    |                                    | FMR1                                               | CGG                | 5'UTR           | 737                                            | 5 - 16                                          |
| C                  | GAA/CCTG/ATTCT/GGCCTG/GGCC Introns | FXN                                                | GAA                | Intron          | 2,166                                          | 5 - 32                                          |
|                    |                                    | BEAN1                                              | GGCCTG             | Intron          | 10                                             | 5 - 66                                          |
|                    |                                    | CNBP                                               | CCTG               | Intron          | 215                                            | 5 - 13                                          |
|                    |                                    | ATXN10                                             | ATTCT              | Intron          | 26                                             | 5 - 16                                          |
|                    |                                    | C9ORF72                                            | GGCCC              | Intron          | 8                                              | 5 - 8                                           |
| D                  | CTG 3'UTR                          | DMPK, ATXN8OS, JPH3                                | CTG                | 3'UTR           | 113                                            | 5 - 20                                          |
| *                  | GAC Exon                           | COMP                                               | GAC                | Exon            | 30                                             | 5 - 9                                           |

\*Excluded from group-based analysis. See Methods.

**Table S5. Description of cell lines and tissue samples used for 5C and CTCF ChIP-seq. Related to Figures 5, 6.**

| <b>Coriell catalog ID/Sample ID</b> | <b>Cell/Tissue type</b> | <b>Disease status</b> | <b>Number of repeats</b> | <b>Age</b> | <b>Race</b> | <b>Gender</b> | <b>Notes</b>                         |
|-------------------------------------|-------------------------|-----------------------|--------------------------|------------|-------------|---------------|--------------------------------------|
| GM09236                             | B-Lymphocyte            | Healthy               | <45                      | 4          | Black       | Male          | Brother of GM09237                   |
| GM09237                             | B-Lymphocyte            | Disease               | 931-940                  | 5          | Black       | Male          |                                      |
| GM04024                             | Fibroblast              | Disease               | 645                      | 29         | Black       | Male          | Derived from same patient as GM04025 |
| GM04025                             | B-Lymphocyte            | Disease               | 645                      | 29         | Black       | Male          |                                      |
| AG06103                             | Fibroblast              | Healthy               | <45                      | 29         | Black       | Male          |                                      |
| GM06890                             | B-Lymphocyte            | Healthy               | <45                      | 19         | White       | Male          | Brother of GM06897                   |
| GM06897                             | B-Lymphocyte            | Disease               | 477                      | 25         | White       | Male          |                                      |
| FXS Case 1                          | Cerebellum              | Disease               | Full mutation            | 60         | Unknown     | Male          | PMI* 54.5h                           |
| Control Case 1                      | Cerebellum              | Healthy               | <45                      | 62         | Unknown     | Male          | PMI* 9.5h                            |
| FXS Case 2                          | Cerebellum              | Disease               | Full mutation            | 74         | Unknown     | Male          | PMI* 40-44h                          |
| Control Case 2                      | Cerebellum              | Healthy               | <45                      | 69         | Unknown     | Male          | PMI* 9.5h                            |

\*Post Mortem Interval
